# Supplementary material for: Genetic influences on brain representations of natural audiovisual experiences
Source: Research Square preprint supplement (doi:10.21203/rs.3.rs-902535/v1), 2021-09-24
Supplement: Supplementary file 1 [file 5986eaa4385acc1ac90a72cd.xlsx]

## Sheet: SuppData3
Region name	MZ similarity	T value	P value (FDR corrected)	DZ similarity	T Value	P value (FDR corrected)
Left thalamus	0.373095	2	3.54203e-40	0.275308	1044	8.38858e-35
Left caudate	0.332686	483	9.0767e-38	0.236608	1469	1.1126e-32
Left putamen	0.34926	213	3.53674e-39	0.299646	634	6.80024e-37
Left pallidum	0.260148	1804	4.25315e-31	0.177679	4315	3.46057e-20
Brain stem	0.379699	557	2.20557e-37	0.329723	1897	1.3178e-30
Left hippocampus	0.331843	386	2.75563e-38	0.2727	928	2.1674e-35
Left amygdala	0.249888	2378	2.15382e-28	0.222615	3381	5.97133e-24
Left accumbens	0.221152	3379	5.53311e-24	0.142334	6714	4.43646e-12
Right thalamus	0.419781	18	3.72049e-40	0.386436	171	2.53463e-39
Right caudate	0.449252	0	3.54203e-40	0.397342	9	4.95648e-40
Right putamen	0.370993	187	2.5922e-39	0.267756	1109	1.75107e-34
Right pallidum	0.246821	2658	4.03361e-27	0.126707	7120	6.2889e-11
Right hippocampus	0.308156	704	1.26935e-36	0.323614	1063	1.04184e-34
Right amygdala	0.324836	921	1.69016e-35	0.276857	2358	1.88283e-28
Right accumbens	0.309315	672	8.66719e-37	0.212317	3338	3.9555e-24
Left fronto-marginal gyrus (of Wernicke) and sulcus	0.476996	23	3.84965e-40	0.425436	16	4.95648e-40
Left inferior occipital gyrus (O3) and sulcus	0.649894	1	3.54203e-40	0.496016	4	4.84985e-40
Left paracentral lobule and sulcus	0.480967	4	3.54203e-40	0.386556	153	2.08117e-39
Left subcentral gyrus (central operculum) and sulci	0.547956	0	3.54203e-40	0.486189	0	4.84985e-40
Left transverse frontopolar gyri and sulci	0.463583	26	3.88636e-40	0.431714	19	4.95648e-40
Left anterior part of the cingulate gyrus and sulcus (ACC)	0.477565	3	3.54203e-40	0.432819	55	6.76952e-40
Left middle-anterior part of the cingulate gyrus and sulcus (aMCC)	0.349483	282	7.82931e-39	0.283105	636	6.90941e-37
Left middle-posterior part of the cingulate gyrus and sulcus (pMCC)	0.354797	196	2.87942e-39	0.29593	990	4.46047e-35
Left posterior-dorsal part of the cingulate gyrus (dPCC)	0.397697	67	6.13978e-40	0.303315	365	2.71288e-38
Left posterior-ventral part of the cingulate gyrus (vPCC, isthmus of the cingulate gyrus)	0.256377	1193	4.08111e-34	0.168884	4478	1.43372e-19
Left cuneus (O6)	0.674219	0	3.54203e-40	0.54854	4	4.84985e-40
Left opercular part of the inferior frontal gyrus	0.542551	0	3.54203e-40	0.482099	3	4.84985e-40
Left orbital part of the inferior frontal gyrus	0.413604	63	5.94088e-40	0.360541	71	8.02122e-40
Left triangular part of the inferior frontal gyrus	0.522762	1	3.54203e-40	0.46108	1	4.84985e-40
Left middle frontal gyrus (F2)	0.600954	1	3.54203e-40	0.579335	0	4.84985e-40
Left superior frontal gyrus (F1)	0.605652	0	3.54203e-40	0.568284	0	4.84985e-40
Left long insular gyrus and central sulcus of the insula	0.386784	61	5.84454e-40	0.353956	634	6.80024e-37
Left short insular gyri	0.418536	14	3.60778e-40	0.379071	225	4.85604e-39
Left middle occipital gyrus (O2, lateral occipital gyrus)	0.640363	9	3.57436e-40	0.455225	3	4.84985e-40
Left superior occipital gyrus (O1)	0.66046	10	3.57436e-40	0.531628	24	5.08349e-40
Left lateral occipito-temporal gyrus (fusiform gyrus, O4-T4)	0.625535	1	3.54203e-40	0.524648	3	4.84985e-40
Left lingual gyrus, ligual part of the medial occipito-temporal gyrus, (O5)	0.674075	0	3.54203e-40	0.567228	3	4.84985e-40
Left parahippocampal gyrus, parahippocampal part of the medial occipito-temporal gyrus, (T5)	0.374835	241	4.9073e-39	0.237798	2573	1.78878e-27
Left orbital gyri	0.505302	5	3.54203e-40	0.418519	38	5.85277e-40
Left angular gyrus	0.61985	2	3.54203e-40	0.502225	0	4.84985e-40
Left supramarginal gyrus	0.636187	0	3.54203e-40	0.570503	0	4.84985e-40
Left superior parietal lobule (lateral part of P1)	0.666161	0	3.54203e-40	0.576437	1	4.84985e-40
Left postcentral gyrus	0.516309	0	3.54203e-40	0.490103	16	4.95648e-40
Left precentral gyrus	0.558212	0	3.54203e-40	0.505078	4	4.84985e-40
Left precuneus (medial part of P1)	0.692063	1	3.54203e-40	0.608227	0	4.84985e-40
Left straight gyrus, Gyrus rectus	0.441441	41	4.61662e-40	0.28935	876	1.18327e-35
Left subcallosal area, subcallosal gyrus	0.32666	1379	3.48279e-33	0.195732	4363	5.25853e-20
Left anterior transverse temporal gyrus (of Heschl)	0.494857	0	3.54203e-40	0.449677	81	8.91042e-40
Left lateral aspect of the superior temporal gyrus	0.632944	0	3.54203e-40	0.566751	39	5.85628e-40
Left planum polare of the superior temporal gyrus	0.320638	604	3.86479e-37	0.255387	2148	1.99346e-29
Left planum temporale or temporal plane of the superior temporal gyrus	0.569809	0	3.54203e-40	0.563718	0	4.84985e-40
Left inferior temporal gyrus (T3)	0.502802	14	3.60778e-40	0.367546	128	1.54901e-39
Left middle temporal gyrus (T2)	0.594474	2	3.54203e-40	0.486311	0	4.84985e-40
Left horizontal ramus of the anterior segment of the lateral sulcus (or fissure)	0.357889	173	2.19116e-39	0.273131	1078	1.23404e-34
Left vertical ramus of the anterior segment of the lateral sulcus (or fissure)	0.335501	484	9.12357e-38	0.254742	1213	5.87412e-34
Left posterior ramus (or segment) of the lateral sulcus (or fissure)	0.511433	0	3.54203e-40	0.427389	42	6.01163e-40
Left occipital pole	0.649223	1	3.54203e-40	0.469488	4	4.84985e-40
Left temporal pole	0.433566	266	6.60796e-39	0.246395	1697	1.45152e-31
Left calcarine sulcus	0.585735	0	3.54203e-40	0.464428	4	4.84985e-40
Left central sulcus (Rolando's fissure)	0.500849	0	3.54203e-40	0.406157	2	4.84985e-40
Left marginal branch (or part) of the cingulate sulcus	0.406332	115	1.07122e-39	0.312878	271	8.56099e-39
Left anterior segment of the circular sulcus of the insula	0.364805	257	5.94993e-39	0.30655	477	1.02784e-37
Left inferior segment of the circular sulcus of the insula	0.398872	104	9.47929e-40	0.334153	763	3.09253e-36
Left superior segment of the circular sulcus of the insula	0.426891	5	3.54203e-40	0.350659	146	1.92463e-39
Left anterior transverse collateral sulcus	0.248992	2912	5.41108e-26	0.164639	5293	1.28857e-16
Left posterior transverse collateral sulcus	0.425098	66	6.11645e-40	0.298895	781	3.81152e-36
Left inferior frontal sulcus	0.591179	0	3.54203e-40	0.580863	0	4.84985e-40
Left middle frontal sulcus	0.493041	0	3.54203e-40	0.489036	1	4.84985e-40
Left superior frontal sulcus	0.564397	0	3.54203e-40	0.567589	0	4.84985e-40
Left sulcus intermedius primus (of Jensen)	0.397886	14	3.60778e-40	0.393006	52	6.59121e-40
Left intraparietal sulcus (interparietal sulcus) and transverse parietal sulci	0.693691	0	3.54203e-40	0.634203	0	4.84985e-40
Left middle occipital sulcus and lunatus sulcus	0.635795	0	3.54203e-40	0.531931	0	4.84985e-40
Left superior occipital sulcus and transverse occipital sulcus	0.640625	0	3.54203e-40	0.491706	0	4.84985e-40
Left anterior occipital sulcus and preoccipital notch (temporo-occipital incisure)	0.647167	0	3.54203e-40	0.55489	0	4.84985e-40
Left lateral occipito-temporal sulcus	0.517831	7	3.57436e-40	0.38314	47	6.25726e-40
Left medial occipito-temporal sulcus (collateral sulcus) and lingual sulcus	0.539578	3	3.54203e-40	0.414755	158	2.1945e-39
Left lateral orbital sulcus	0.421387	108	9.88718e-40	0.32896	411	4.75624e-38
Left medial orbital sulcus (olfactory sulcus)	0.357719	306	1.04872e-38	0.23978	1897	1.3178e-30
Left orbital sulci (H-shaped sulci)	0.457791	20	3.7787e-40	0.36739	169	2.49601e-39
Left parieto-occipital sulcus (or fissure)	0.555954	0	3.54203e-40	0.459118	18	4.95648e-40
Left pericallosal sulcus (S of corpus callosum)	0.262638	969	2.95362e-35	0.144935	5146	3.96462e-17
Left postcentral sulcus	0.582393	0	3.54203e-40	0.51991	2	4.84985e-40
Left inferior part of the precentral sulcus	0.557873	0	3.54203e-40	0.518404	0	4.84985e-40
Left superior part of the precentral sulcus	0.489236	2	3.54203e-40	0.418919	20	4.95648e-40
Left suborbital sulcus (sulcus rostrales, supraorbital sulcus)	0.390205	277	7.41055e-39	0.268682	1404	5.32081e-33
Left subparietal sulcus	0.43129	1	3.54203e-40	0.368824	73	8.13799e-40
Left inferior temporal sulcus	0.508871	8	3.57436e-40	0.424539	1	4.84985e-40
Left superior temporal sulcus (parallel sulcus)	0.709788	0	3.54203e-40	0.632931	0	4.84985e-40
Left transverse temporal sulcus	0.377041	344	1.64708e-38	0.356285	423	5.41855e-38
Right fronto-marginal gyrus (of Wernicke) and sulcus	0.46964	35	4.31733e-40	0.393741	123	1.46927e-39
Right inferior occipital gyrus (O3) and sulcus	0.661336	1	3.54203e-40	0.53622	1	4.84985e-40
Right paracentral lobule and sulcus	0.554095	0	3.54203e-40	0.537397	0	4.84985e-40
Right subcentral gyrus (central operculum) and sulci	0.460699	1	3.54203e-40	0.389095	38	5.85277e-40
Right transverse frontopolar gyri and sulci	0.517419	10	3.57436e-40	0.422648	184	2.95658e-39
Right anterior part of the cingulate gyrus and sulcus (ACC)	0.532824	0	3.54203e-40	0.520044	1	4.84985e-40
Right middle-anterior part of the cingulate gyrus and sulcus (aMCC)	0.454862	3	3.54203e-40	0.467899	0	4.84985e-40
Right middle-posterior part of the cingulate gyrus and sulcus (pMCC)	0.506272	0	3.54203e-40	0.448438	1	4.84985e-40
Right posterior-dorsal part of the cingulate gyrus (dPCC)	0.550324	0	3.54203e-40	0.479696	0	4.84985e-40
Right posterior-ventral part of the cingulate gyrus (vPCC, isthmus of the cingulate gyrus)	0.411022	1	3.54203e-40	0.321541	538	2.1388e-37
Right cuneus (O6)	0.658988	0	3.54203e-40	0.600469	3	4.84985e-40
Right opercular part of the inferior frontal gyrus	0.497507	1	3.54203e-40	0.431266	15	4.95648e-40
Right orbital part of the inferior frontal gyrus	0.419137	22	3.8382e-40	0.325526	671	1.04024e-36
Right triangular part of the inferior frontal gyrus	0.554084	0	3.54203e-40	0.485758	5	4.84985e-40
Right middle frontal gyrus (F2)	0.619661	0	3.54203e-40	0.636699	0	4.84985e-40
Right superior frontal gyrus (F1)	0.656535	0	3.54203e-40	0.646019	0	4.84985e-40
Right long insular gyrus and central sulcus of the insula	0.236944	2180	2.60431e-29	0.195807	3209	1.12362e-24
Right short insular gyri	0.323883	628	5.10855e-37	0.286036	671	1.04024e-36
Right middle occipital gyrus (O2, lateral occipital gyrus)	0.733875	1	3.54203e-40	0.621657	0	4.84985e-40
Right superior occipital gyrus (O1)	0.711429	0	3.54203e-40	0.60217	2	4.84985e-40
Right lateral occipito-temporal gyrus (fusiform gyrus, O4-T4)	0.577469	12	3.60778e-40	0.514502	23	5.08349e-40
Right lingual gyrus, ligual part of the medial occipito-temporal gyrus, (O5)	0.603922	0	3.54203e-40	0.50831	11	4.95648e-40
Right parahippocampal gyrus, parahippocampal part of the medial occipito-temporal gyrus, (T5)	0.324552	829	5.69631e-36	0.326891	1540	2.48139e-32
Right orbital gyri	0.507205	0	3.54203e-40	0.40142	104	1.17987e-39
Right angular gyrus	0.719616	0	3.54203e-40	0.676984	0	4.84985e-40
Right supramarginal gyrus	0.641868	0	3.54203e-40	0.584812	0	4.84985e-40
Right superior parietal lobule (lateral part of P1)	0.656301	0	3.54203e-40	0.596848	0	4.84985e-40
Right postcentral gyrus	0.54264	2	3.54203e-40	0.445557	71	8.02122e-40
Right precentral gyrus	0.604097	0	3.54203e-40	0.56571	0	4.84985e-40
Right precuneus (medial part of P1)	0.7418	0	3.54203e-40	0.687597	0	4.84985e-40
Right straight gyrus, Gyrus rectus	0.35295	586	3.12344e-37	0.241285	2136	1.76262e-29
Right subcallosal area, subcallosal gyrus	0.303091	929	1.84706e-35	0.20552	3174	8.00381e-25
Right anterior transverse temporal gyrus (of Heschl)	0.352828	128	1.25211e-39	0.337927	442	6.79241e-38
Right lateral aspect of the superior temporal gyrus	0.60387	0	3.54203e-40	0.568483	0	4.84985e-40
Right planum polare of the superior temporal gyrus	0.377525	96	8.71484e-40	0.370196	701	1.48487e-36
Right planum temporale or temporal plane of the superior temporal gyrus	0.557691	0	3.54203e-40	0.509165	0	4.84985e-40
Right inferior temporal gyrus (T3)	0.53499	2	3.54203e-40	0.423479	34	5.70141e-40
Right middle temporal gyrus (T2)	0.657715	0	3.54203e-40	0.598117	0	4.84985e-40
Right horizontal ramus of the anterior segment of the lateral sulcus (or fissure)	0.346114	333	1.44684e-38	0.292062	536	2.1051e-37
Right vertical ramus of the anterior segment of the lateral sulcus (or fissure)	0.251929	1218	5.42845e-34	0.193994	3698	1.23167e-22
Right posterior ramus (or segment) of the lateral sulcus (or fissure)	0.39237	42	4.63281e-40	0.297962	413	4.83119e-38
Right occipital pole	0.646129	0	3.54203e-40	0.528715	20	4.95648e-40
Right temporal pole	0.412469	217	3.68923e-39	0.255958	1898	1.32318e-30
Right calcarine sulcus	0.599008	0	3.54203e-40	0.514994	2	4.84985e-40
Right central sulcus (Rolando's fissure)	0.455177	0	3.54203e-40	0.361542	123	1.46927e-39
Right marginal branch (or part) of the cingulate sulcus	0.54527	0	3.54203e-40	0.452106	0	4.84985e-40
Right anterior segment of the circular sulcus of the insula	0.277379	1187	3.82954e-34	0.222481	2373	2.19328e-28
Right inferior segment of the circular sulcus of the insula	0.346395	328	1.36953e-38	0.312474	950	2.79474e-35
Right superior segment of the circular sulcus of the insula	0.286888	890	1.1751e-35	0.266599	918	1.93893e-35
Right anterior transverse collateral sulcus	0.341584	554	2.14103e-37	0.13276	5998	2.8764e-14
Right posterior transverse collateral sulcus	0.453699	0	3.54203e-40	0.37106	296	1.15921e-38
Right inferior frontal sulcus	0.537282	1	3.54203e-40	0.490379	3	4.84985e-40
Right middle frontal sulcus	0.507421	0	3.54203e-40	0.526727	0	4.84985e-40
Right superior frontal sulcus	0.495539	0	3.54203e-40	0.500195	5	4.84985e-40
Right sulcus intermedius primus (of Jensen)	0.414674	102	9.32191e-40	0.443002	10	4.95648e-40
Right intraparietal sulcus (interparietal sulcus) and transverse parietal sulci	0.657569	0	3.54203e-40	0.623146	0	4.84985e-40
Right middle occipital sulcus and lunatus sulcus	0.605617	1	3.54203e-40	0.506821	0	4.84985e-40
Right superior occipital sulcus and transverse occipital sulcus	0.646652	1	3.54203e-40	0.561527	0	4.84985e-40
Right anterior occipital sulcus and preoccipital notch (temporo-occipital incisure)	0.549032	3	3.54203e-40	0.471893	1	4.84985e-40
Right lateral occipito-temporal sulcus	0.449725	71	6.4029e-40	0.413386	207	3.91062e-39
Right medial occipito-temporal sulcus (collateral sulcus) and lingual sulcus	0.52785	1	3.54203e-40	0.476588	15	4.95648e-40
Right lateral orbital sulcus	0.354899	274	7.19213e-39	0.270653	1096	1.51401e-34
Right medial orbital sulcus (olfactory sulcus)	0.367062	618	4.5533e-37	0.245483	1870	9.91525e-31
Right orbital sulci (H-shaped sulci)	0.444699	24	3.86149e-40	0.368997	469	9.39547e-38
Right parieto-occipital sulcus (or fissure)	0.597468	0	3.54203e-40	0.542041	0	4.84985e-40
Right pericallosal sulcus (S of corpus callosum)	0.512609	0	3.54203e-40	0.457592	4	4.84985e-40
Right postcentral sulcus	0.538222	0	3.54203e-40	0.41375	45	6.17192e-40
Right inferior part of the precentral sulcus	0.521167	5	3.54203e-40	0.494796	2	4.84985e-40
Right superior part of the precentral sulcus	0.426975	16	3.66352e-40	0.401033	18	4.95648e-40
Right suborbital sulcus (sulcus rostrales, supraorbital sulcus)	0.37937	271	6.9805e-39	0.265535	2070	8.66672e-30
Right subparietal sulcus	0.588619	1	3.54203e-40	0.562037	0	4.84985e-40
Right inferior temporal sulcus	0.424283	26	3.88636e-40	0.413768	56	6.77905e-40
Right superior temporal sulcus (parallel sulcus)	0.675495	0	3.54203e-40	0.619516	0	4.84985e-40
Right transverse temporal sulcus	0.351593	241	4.9073e-39	0.328015	703	1.50895e-36
