# Supplementary material for: Genetic influences on brain representations of natural audiovisual experiences
Source: Research Square preprint supplement (doi:10.21203/rs.3.rs-902535/v1), 2021-09-24
Supplement: Supplementary file 3 [file b9d11c5fb2fdf5bdc23a9671.xlsx]

## Sheet: SuppData5
Region name	MZ-DZ difference T value	MZ-DZ difference P value (FDR corrected)	Falconer's heritability	Holzinger's heritability
Left thalamus	7608	3.1886e-09	0.195573	0.134935
Left caudate	8209	7.76108e-08	0.192156	0.125856
Left putamen	10170	0.000399059	0.0992274	0.0708409
Left pallidum	9298	1.3353e-05	0.164938	0.100288
Brain stem	11760	0.0404353	0.0999516	0.0745599
Left hippocampus	10198	0.000434803	0.118286	0.0813188
Left amygdala	12610	0.208911	0.0545458	0.0350829
Left accumbens	11167	0.00910288	0.157636	0.0918982
Right thalamus	11976	0.0642016	0.0666887	0.0543454
Right caudate	9556	3.76029e-05	0.103821	0.0861361
Right putamen	8070	3.77365e-08	0.206474	0.140987
Right pallidum	8781	1.29775e-06	0.240228	0.137542
Right hippocampus	13637	0.746319	-0.0309175	-0.022855
Right amygdala	11673	0.0330695	0.0959595	0.0663489
Right accumbens	9413	2.14867e-05	0.193997	0.123144
Left fronto-marginal gyrus (of Wernicke) and sulcus	10003	0.000216629	0.10312	0.0897376
Left inferior occipital gyrus (O3) and sulcus	2253	1.81629e-27	0.307756	0.305323
Left paracentral lobule and sulcus	6973	8.29792e-11	0.188822	0.153903
Left subcentral gyrus (central operculum) and sulci	8369	1.73441e-07	0.123534	0.120214
Left transverse frontopolar gyri and sulci	11229	0.0106799	0.063737	0.0560783
Left anterior part of the cingulate gyrus and sulcus (ACC)	10285	0.00057185	0.0894927	0.0788925
Left middle-anterior part of the cingulate gyrus and sulcus (aMCC)	9552	3.75119e-05	0.132756	0.0925907
Left middle-posterior part of the cingulate gyrus and sulcus (pMCC)	10217	0.000454457	0.117735	0.0836102
Left posterior-dorsal part of the cingulate gyrus (dPCC)	7552	2.34267e-09	0.188762	0.135472
Left posterior-ventral part of the cingulate gyrus (vPCC, isthmus of the cingulate gyrus)	9098	5.50405e-06	0.174986	0.105272
Left cuneus (O6)	1691	1.89974e-29	0.251357	0.278383
Left opercular part of the inferior frontal gyrus	8022	2.92984e-08	0.120904	0.116725
Left orbital part of the inferior frontal gyrus	10275	0.000556204	0.106125	0.0829806
Left triangular part of the inferior frontal gyrus	8266	1.04139e-07	0.123363	0.114454
Left middle frontal gyrus (F2)	11194	0.00975283	0.0432377	0.0513921
Left superior frontal gyrus (F1)	9892	0.000144617	0.0747369	0.0865579
Left long insular gyrus and central sulcus of the insula	12750	0.259336	0.065656	0.0508139
Left short insular gyri	11083	0.00720046	0.0789285	0.0635568
Left middle occipital gyrus (O2, lateral occipital gyrus)	2050	3.36849e-28	0.370276	0.339843
Left superior occipital gyrus (O1)	2575	3.91394e-26	0.257665	0.275064
Left lateral occipito-temporal gyrus (fusiform gyrus, O4-T4)	4679	5.84125e-18	0.201773	0.212236
Left lingual gyrus, ligual part of the medial occipito-temporal gyrus, (O5)	2723	1.41228e-25	0.213696	0.246892
Left parahippocampal gyrus, parahippocampal part of the medial occipito-temporal gyrus, (T5)	7341	6.82569e-10	0.274074	0.179791
Left orbital gyri	7360	7.54753e-10	0.173567	0.149246
Left angular gyrus	3618	8.14157e-22	0.235251	0.236302
Left supramarginal gyrus	6978	8.39684e-11	0.131368	0.152932
Left superior parietal lobule (lateral part of P1)	4649	4.73369e-18	0.179448	0.211831
Left postcentral gyrus	11605	0.028185	0.0524121	0.0513948
Left precentral gyrus	9497	2.99773e-05	0.106268	0.107358
Left precuneus (medial part of P1)	4594	3.44193e-18	0.167672	0.213991
Left straight gyrus, Gyrus rectus	5585	6.61015e-15	0.304183	0.214017
Left subcallosal area, subcallosal gyrus	8387	1.88396e-07	0.261857	0.162792
Left anterior transverse temporal gyrus (of Heschl)	10201	0.000435887	0.090361	0.0820981
Left lateral aspect of the superior temporal gyrus	6887	4.93626e-11	0.132387	0.152784
Left planum polare of the superior temporal gyrus	10178	0.000407465	0.130501	0.0876304
Left planum temporale or temporal plane of the superior temporal gyrus	13363	0.576044	0.0121822	0.0139614
Left inferior temporal gyrus (T3)	4921	3.53566e-17	0.270512	0.213859
Left middle temporal gyrus (T2)	4602	3.49351e-18	0.216326	0.210562
Left horizontal ramus of the anterior segment of the lateral sulcus (or fissure)	8820	1.53611e-06	0.169516	0.116607
Left vertical ramus of the anterior segment of the lateral sulcus (or fissure)	8759	1.18368e-06	0.161518	0.108364
Left posterior ramus (or segment) of the lateral sulcus (or fissure)	6510	4.15993e-12	0.168088	0.146773
Left occipital pole	2048	3.36849e-28	0.35947	0.338795
Left temporal pole	4760	1.0667e-17	0.374341	0.248367
Left calcarine sulcus	3755	2.71857e-21	0.242615	0.2265
Left central sulcus (Rolando's fissure)	6187	4.95543e-13	0.189384	0.159456
Left marginal branch (or part) of the cingulate sulcus	6917	5.8819e-11	0.186909	0.136009
Left anterior segment of the circular sulcus of the insula	10213	0.000451629	0.116508	0.0840063
Left inferior segment of the circular sulcus of the insula	10041	0.000248263	0.129438	0.0971977
Left superior segment of the circular sulcus of the insula	8818	1.53611e-06	0.152463	0.117398
Left anterior transverse collateral sulcus	10460	0.00104984	0.168706	0.100978
Left posterior transverse collateral sulcus	6290	9.34011e-13	0.252407	0.180006
Left inferior frontal sulcus	12533	0.184212	0.0206323	0.0246128
Left middle frontal sulcus	13244	0.503123	0.008009	0.00783715
Left superior frontal sulcus	13623	0.740775	-0.00638486	-0.00738286
Left sulcus intermedius primus (of Jensen)	13502	0.663131	0.00976051	0.00804003
Left intraparietal sulcus (interparietal sulcus) and transverse parietal sulci	6443	2.6756e-12	0.118976	0.162626
Left middle occipital sulcus and lunatus sulcus	4708	7.15584e-18	0.207728	0.221899
Left superior occipital sulcus and transverse occipital sulcus	2187	1.11641e-27	0.297838	0.292978
Left anterior occipital sulcus and preoccipital notch (temporo-occipital incisure)	4234	1.87405e-19	0.184552	0.207311
Left lateral occipito-temporal sulcus	4218	1.74889e-19	0.269383	0.21835
Left medial occipito-temporal sulcus (collateral sulcus) and lingual sulcus	4835	1.92837e-17	0.249646	0.213283
Left lateral orbital sulcus	7429	1.1329e-09	0.184853	0.137737
Left medial orbital sulcus (olfactory sulcus)	8168	6.32774e-08	0.235879	0.155138
Left orbital sulci (H-shaped sulci)	7712	5.58857e-09	0.180801	0.142901
Left parieto-occipital sulcus (or fissure)	5815	3.59192e-14	0.193672	0.179034
Left pericallosal sulcus (S of corpus callosum)	8420	2.21282e-07	0.235407	0.137655
Left postcentral sulcus	7253	4.08885e-10	0.124967	0.130149
Left inferior part of the precentral sulcus	9934	0.000167402	0.078938	0.0819545
Left superior part of the precentral sulcus	7813	9.74844e-09	0.140633	0.12101
Left suborbital sulcus (sulcus rostrales, supraorbital sulcus)	7102	1.69256e-10	0.243046	0.16617
Left subparietal sulcus	8747	1.13554e-06	0.12493	0.0989664
Left inferior temporal sulcus	7017	1.03849e-10	0.168663	0.146546
Left superior temporal sulcus (parallel sulcus)	4875	2.49731e-17	0.153713	0.209379
Left transverse temporal sulcus	12499	0.174671	0.0415117	0.0322439
Right fronto-marginal gyrus (of Wernicke) and sulcus	8927	2.54463e-06	0.151798	0.125192
Right inferior occipital gyrus (O3) and sulcus	2785	2.40331e-25	0.250232	0.269774
Right paracentral lobule and sulcus	11826	0.0468272	0.0333959	0.0360956
Right subcentral gyrus (central operculum) and sulci	8169	6.32774e-08	0.143209	0.11721
Right transverse frontopolar gyri and sulci	7084	1.55693e-10	0.189543	0.164148
Right anterior part of the cingulate gyrus and sulcus (ACC)	12195	0.100957	0.0255588	0.0266262
Right middle-anterior part of the cingulate gyrus and sulcus (aMCC)	13121	0.432882	-0.0260737	-0.0245007
Right middle-posterior part of the cingulate gyrus and sulcus (pMCC)	9039	4.27242e-06	0.115668	0.104855
Right posterior-dorsal part of the cingulate gyrus (dPCC)	7180	2.72631e-10	0.141254	0.135742
Right posterior-ventral part of the cingulate gyrus (vPCC, isthmus of the cingulate gyrus)	7191	2.87e-10	0.178962	0.131888
Right cuneus (O6)	7875	1.37054e-08	0.117037	0.146468
Right opercular part of the inferior frontal gyrus	8293	1.1882e-07	0.132482	0.116471
Right orbital part of the inferior frontal gyrus	7945	1.98178e-08	0.187223	0.138792
Right triangular part of the inferior frontal gyrus	7609	3.1886e-09	0.136653	0.132868
Right middle frontal gyrus (F2)	12324	0.12913	-0.0340759	-0.0468976
Right superior frontal gyrus (F1)	12439	0.158955	0.0210308	0.0297061
Right long insular gyrus and central sulcus of the insula	11474	0.0205107	0.0822756	0.0511541
Right short insular gyri	10902	0.00425414	0.0756956	0.0530108
Right middle occipital gyrus (O2, lateral occipital gyrus)	2450	1.2303e-26	0.224435	0.296603
Right superior occipital gyrus (O1)	2647	7.24288e-26	0.218517	0.274637
Right lateral occipito-temporal gyrus (fusiform gyrus, O4-T4)	7888	1.45527e-08	0.125934	0.129696
Right lingual gyrus, ligual part of the medial occipito-temporal gyrus, (O5)	5227	4.18611e-16	0.191225	0.194457
Right parahippocampal gyrus, parahippocampal part of the medial occipito-temporal gyrus, (T5)	13866	0.91127	-0.00467745	-0.00347451
Right orbital gyri	6614	8.29915e-12	0.211572	0.176728
Right angular gyrus	7799	9.12387e-09	0.0852652	0.131983
Right supramarginal gyrus	7016	1.03849e-10	0.114111	0.137421
Right superior parietal lobule (lateral part of P1)	7221	3.40513e-10	0.118905	0.14747
Right postcentral gyrus	5855	4.70797e-14	0.194166	0.1751
Right precentral gyrus	9457	2.54928e-05	0.0767737	0.08839
Right precuneus (medial part of P1)	6101	2.73382e-13	0.108405	0.173503
Right straight gyrus, Gyrus rectus	7281	4.78625e-10	0.22333	0.147177
Right subcallosal area, subcallosal gyrus	9437	2.36114e-05	0.195143	0.122812
Right anterior transverse temporal gyrus (of Heschl)	12945	0.343935	0.0298032	0.0225075
Right lateral aspect of the superior temporal gyrus	9813	0.000106697	0.0707734	0.0820053
Right planum polare of the superior temporal gyrus	13485	0.655373	0.0146583	0.0116372
Right planum temporale or temporal plane of the superior temporal gyrus	8458	2.66514e-07	0.0970519	0.0988641
Right inferior temporal gyrus (T3)	5258	5.19203e-16	0.223023	0.193421
Right middle temporal gyrus (T2)	7086	1.55693e-10	0.119195	0.148295
Right horizontal ramus of the anterior segment of the lateral sulcus (or fissure)	9919	0.00015931	0.108103	0.0763506
Right vertical ramus of the anterior segment of the lateral sulcus (or fissure)	10599	0.00165356	0.11587	0.0718792
Right posterior ramus (or segment) of the lateral sulcus (or fissure)	8019	2.91973e-08	0.188817	0.134478
Right occipital pole	4273	2.47751e-19	0.234828	0.249136
Right temporal pole	6286	9.30531e-13	0.313023	0.210353
Right calcarine sulcus	5603	7.35901e-15	0.168027	0.173222
Right central sulcus (Rolando's fissure)	6285	9.30531e-13	0.187269	0.146658
Right marginal branch (or part) of the cingulate sulcus	6002	1.3627e-13	0.186329	0.170041
Right anterior segment of the circular sulcus of the insula	10626	0.00179397	0.109796	0.0706067
Right inferior segment of the circular sulcus of the insula	11942	0.0599978	0.0678416	0.0493375
Right superior segment of the circular sulcus of the insula	12622	0.211764	0.0405786	0.0276646
Right anterior transverse collateral sulcus	4860	2.28716e-17	0.417648	0.240791
Right posterior transverse collateral sulcus	7691	5.01631e-09	0.165277	0.131393
Right inferior frontal sulcus	9180	7.93422e-06	0.093807	0.092036
Right middle frontal sulcus	12967	0.352669	-0.0386126	-0.0407932
Right superior frontal sulcus	13537	0.683567	-0.00931064	-0.00931426
Right sulcus intermedius primus (of Jensen)	11856	0.0498055	-0.0566557	-0.0508581
Right intraparietal sulcus (interparietal sulcus) and transverse parietal sulci	9557	3.76029e-05	0.0688454	0.0913423
Right middle occipital sulcus and lunatus sulcus	4513	1.80744e-18	0.197591	0.200324
Right superior occipital sulcus and transverse occipital sulcus	4646	4.73369e-18	0.170249	0.194138
Right anterior occipital sulcus and preoccipital notch (temporo-occipital incisure)	6251	7.63355e-13	0.154277	0.146066
Right lateral occipito-temporal sulcus	10871	0.00389693	0.0726781	0.0619471
Right medial occipito-temporal sulcus (collateral sulcus) and lingual sulcus	9413	2.14867e-05	0.102524	0.0979382
Right lateral orbital sulcus	8760	1.18368e-06	0.168492	0.115509
Right medial orbital sulcus (olfactory sulcus)	7665	4.37146e-09	0.243159	0.161135
Right orbital sulci (H-shaped sulci)	9397	2.0442e-05	0.151404	0.119971
Right parieto-occipital sulcus (or fissure)	7982	2.4067e-08	0.110856	0.121032
Right pericallosal sulcus (S of corpus callosum)	9078	5.06959e-06	0.110035	0.101432
Right postcentral sulcus	4468	1.29744e-18	0.248943	0.212319
Right inferior part of the precentral sulcus	10520	0.00127841	0.0527431	0.0521997
Right superior part of the precentral sulcus	11549	0.0246724	0.0518851	0.0433121
Right suborbital sulcus (sulcus rostrales, supraorbital sulcus)	8356	1.63917e-07	0.227669	0.154989
Right subparietal sulcus	10989	0.00549557	0.0531641	0.0606947
Right inferior temporal sulcus	12893	0.320839	0.0210302	0.0179368
Right superior temporal sulcus (parallel sulcus)	6873	4.60196e-11	0.111958	0.147126
Right transverse temporal sulcus	12484	0.171227	0.0471555	0.0350867
