# Supplementary material for: Genetic influences on brain representations of natural audiovisual experiences
Source: Research Square preprint supplement (doi:10.21203/rs.3.rs-902535/v1), 2021-09-24
Supplement: Supplementary file 6 [file d6684a38ea44331e5f40a2e3.xlsx]

## Sheet: SuppData4
Region name	MZ similarity	DZ similarity
Left thalamus	0.117842	0.0869563
Left caudate	0.0994641	0.0707395
Left putamen	0.113358	0.0972549
Left pallidum	0.0585521	0.0399906
Brain stem	0.0986858	0.0856968
Left hippocampus	0.09323	0.076614
Left amygdala	0.0530932	0.0472986
Left accumbens	0.0433279	0.027886
Right thalamus	0.150436	0.138486
Right caudate	0.179108	0.158412
Right putamen	0.116038	0.0837475
Right pallidum	0.0478904	0.0245848
Right hippocampus	0.0808517	0.0849077
Right amygdala	0.0780384	0.0665118
Right accumbens	0.0728025	0.0499723
Left fronto-marginal gyrus (of Wernicke) and sulcus	0.189142	0.168697
Left inferior occipital gyrus (O3) and sulcus	0.342041	0.261055
Left paracentral lobule and sulcus	0.208346	0.167449
Left subcentral gyrus (central operculum) and sulci	0.270904	0.240367
Left transverse frontopolar gyri and sulci	0.179247	0.166925
Left anterior part of the cingulate gyrus and sulcus (ACC)	0.202722	0.183727
Left middle-anterior part of the cingulate gyrus and sulcus (aMCC)	0.111676	0.0904653
Left middle-posterior part of the cingulate gyrus and sulcus (pMCC)	0.116615	0.0972661
Left posterior-dorsal part of the cingulate gyrus (dPCC)	0.145659	0.111091
Left posterior-ventral part of the cingulate gyrus (vPCC, isthmus of the cingulate gyrus)	0.0589006	0.0387998
Left cuneus (O6)	0.394912	0.321298
Left opercular part of the inferior frontal gyrus	0.264841	0.235332
Left orbital part of the inferior frontal gyrus	0.140382	0.122372
Left triangular part of the inferior frontal gyrus	0.237563	0.209533
Left middle frontal gyrus (F2)	0.328213	0.316406
Left superior frontal gyrus (F1)	0.333263	0.312701
Left long insular gyrus and central sulcus of the insula	0.123838	0.113327
Left short insular gyri	0.15226	0.137903
Left middle occipital gyrus (O2, lateral occipital gyrus)	0.314349	0.223466
Left superior occipital gyrus (O1)	0.369069	0.297077
Left lateral occipito-temporal gyrus (fusiform gyrus, O4-T4)	0.333996	0.280129
Left lingual gyrus, ligual part of the medial occipito-temporal gyrus, (O5)	0.396077	0.333295
Left parahippocampal gyrus, parahippocampal part of the medial occipito-temporal gyrus, (T5)	0.0965005	0.0612205
Left orbital gyri	0.206943	0.171401
Left angular gyrus	0.342107	0.277187
Left supramarginal gyrus	0.377725	0.338726
Left superior parietal lobule (lateral part of P1)	0.405547	0.350925
Left postcentral gyrus	0.243484	0.231125
Left precentral gyrus	0.280491	0.253793
Left precuneus (medial part of P1)	0.442289	0.388711
Left straight gyrus, Gyrus rectus	0.136421	0.0894192
Left subcallosal area, subcallosal gyrus	0.0753983	0.045178
Left anterior transverse temporal gyrus (of Heschl)	0.217521	0.197661
Left lateral aspect of the superior temporal gyrus	0.347553	0.311206
Left planum polare of the superior temporal gyrus	0.083442	0.0664613
Left planum temporale or temporal plane of the superior temporal gyrus	0.306872	0.303592
Left inferior temporal gyrus (T3)	0.197256	0.144193
Left middle temporal gyrus (T2)	0.300704	0.245992
Left horizontal ramus of the anterior segment of the lateral sulcus (or fissure)	0.113892	0.0869193
Left vertical ramus of the anterior segment of the lateral sulcus (or fissure)	0.100814	0.0765465
Left posterior ramus (or segment) of the lateral sulcus (or fissure)	0.22795	0.190491
Left occipital pole	0.304765	0.220392
Left temporal pole	0.121771	0.0692024
Left calcarine sulcus	0.286645	0.22728
Left central sulcus (Rolando's fissure)	0.224301	0.181894
Left marginal branch (or part) of the cingulate sulcus	0.147354	0.113463
Left anterior segment of the circular sulcus of the insula	0.120165	0.100977
Left inferior segment of the circular sulcus of the insula	0.129443	0.10844
Left superior segment of the circular sulcus of the insula	0.161102	0.132333
Left anterior transverse collateral sulcus	0.050607	0.0334625
Left posterior transverse collateral sulcus	0.144156	0.101359
Left inferior frontal sulcus	0.328241	0.322513
Left middle frontal sulcus	0.226377	0.224538
Left superior frontal sulcus	0.309634	0.311385
Left sulcus intermedius primus (of Jensen)	0.163235	0.161233
Left intraparietal sulcus (interparietal sulcus) and transverse parietal sulci	0.453869	0.414947
Left middle occipital sulcus and lunatus sulcus	0.342636	0.286663
Left superior occipital sulcus and transverse occipital sulcus	0.350862	0.269301
Left anterior occipital sulcus and preoccipital notch (temporo-occipital incisure)	0.368223	0.31572
Left lateral occipito-temporal sulcus	0.214706	0.15886
Left medial occipito-temporal sulcus (collateral sulcus) and lingual sulcus	0.234319	0.180113
Left lateral orbital sulcus	0.146749	0.114561
Left medial orbital sulcus (olfactory sulcus)	0.0956638	0.0641236
Left orbital sulci (H-shaped sulci)	0.168126	0.134926
Left parieto-occipital sulcus (or fissure)	0.27503	0.227126
Left pericallosal sulcus (S of corpus callosum)	0.0620261	0.0342285
Left postcentral sulcus	0.314942	0.281152
Left inferior part of the precentral sulcus	0.292405	0.271717
Left superior part of the precentral sulcus	0.218901	0.187439
Left suborbital sulcus (sulcus rostrales, supraorbital sulcus)	0.116164	0.0799868
Left subparietal sulcus	0.174957	0.149617
Left inferior temporal sulcus	0.225201	0.18788
Left superior temporal sulcus (parallel sulcus)	0.461189	0.411251
Left transverse temporal sulcus	0.132508	0.125214
Right fronto-marginal gyrus (of Wernicke) and sulcus	0.173373	0.145354
Right inferior occipital gyrus (O3) and sulcus	0.379265	0.307513
Right paracentral lobule and sulcus	0.301319	0.292239
Right subcentral gyrus (central operculum) and sulci	0.190213	0.160649
Right transverse frontopolar gyri and sulci	0.211534	0.172789
Right anterior part of the cingulate gyrus and sulcus (ACC)	0.269404	0.262942
Right middle-anterior part of the cingulate gyrus and sulcus (aMCC)	0.208082	0.214046
Right middle-posterior part of the cingulate gyrus and sulcus (pMCC)	0.242074	0.214421
Right posterior-dorsal part of the cingulate gyrus (dPCC)	0.279969	0.244039
Right posterior-ventral part of the cingulate gyrus (vPCC, isthmus of the cingulate gyrus)	0.150508	0.117742
Right cuneus (O6)	0.404606	0.368676
Right opercular part of the inferior frontal gyrus	0.22786	0.197521
Right orbital part of the inferior frontal gyrus	0.140698	0.109274
Right triangular part of the inferior frontal gyrus	0.274479	0.240632
Right middle frontal gyrus (F2)	0.372266	0.382502
Right superior frontal gyrus (F1)	0.418289	0.41159
Right long insular gyrus and central sulcus of the insula	0.0540476	0.044664
Right short insular gyri	0.099995	0.08831
Right middle occipital gyrus (O2, lateral occipital gyrus)	0.479325	0.406031
Right superior occipital gyrus (O1)	0.449736	0.380667
Right lateral occipito-temporal gyrus (fusiform gyrus, O4-T4)	0.296574	0.264235
Right lingual gyrus, ligual part of the medial occipito-temporal gyrus, (O5)	0.312601	0.26311
Right parahippocampal gyrus, parahippocampal part of the medial occipito-temporal gyrus, (T5)	0.0811173	0.0817019
Right orbital gyri	0.201846	0.159748
Right angular gyrus	0.498668	0.469125
Right supramarginal gyrus	0.394057	0.359029
Right superior parietal lobule (lateral part of P1)	0.405479	0.368748
Right postcentral gyrus	0.268542	0.220497
Right precentral gyrus	0.345237	0.323299
Right precuneus (medial part of P1)	0.525272	0.486891
Right straight gyrus, Gyrus rectus	0.104092	0.0711596
Right subcallosal area, subcallosal gyrus	0.0733021	0.0497046
Right anterior transverse temporal gyrus (of Heschl)	0.115218	0.110352
Right lateral aspect of the superior temporal gyrus	0.333943	0.314374
Right planum polare of the superior temporal gyrus	0.112817	0.110626
Right planum temporale or temporal plane of the superior temporal gyrus	0.290567	0.265284
Right inferior temporal gyrus (T3)	0.231498	0.183245
Right middle temporal gyrus (T2)	0.388873	0.353636
Right horizontal ramus of the anterior segment of the lateral sulcus (or fissure)	0.112729	0.0951248
Right vertical ramus of the anterior segment of the lateral sulcus (or fissure)	0.0643378	0.0495423
Right posterior ramus (or segment) of the lateral sulcus (or fissure)	0.13059	0.0991683
Right occipital pole	0.353453	0.289224
Right temporal pole	0.119612	0.074225
Right calcarine sulcus	0.320953	0.275938
Right central sulcus (Rolando's fissure)	0.187589	0.149
Right marginal branch (or part) of the cingulate sulcus	0.273497	0.226768
Right anterior segment of the circular sulcus of the insula	0.075006	0.060161
Right inferior segment of the circular sulcus of the insula	0.101835	0.0918629
Right superior segment of the circular sulcus of the insula	0.0846955	0.0787057
Right anterior transverse collateral sulcus	0.0739374	0.0287366
Right posterior transverse collateral sulcus	0.180867	0.147924
Right inferior frontal sulcus	0.266806	0.243515
Right middle frontal sulcus	0.245434	0.254773
Right superior frontal sulcus	0.240673	0.242934
Right sulcus intermedius primus (of Jensen)	0.174587	0.186514
Right intraparietal sulcus (interparietal sulcus) and transverse parietal sulci	0.410575	0.389082
Right middle occipital sulcus and lunatus sulcus	0.321165	0.268772
Right superior occipital sulcus and transverse occipital sulcus	0.377039	0.327406
Right anterior occipital sulcus and preoccipital notch (temporo-occipital incisure)	0.263552	0.226523
Right lateral occipito-temporal sulcus	0.174146	0.160074
Right medial occipito-temporal sulcus (collateral sulcus) and lingual sulcus	0.242846	0.219262
Right lateral orbital sulcus	0.104763	0.0798946
Right medial orbital sulcus (olfactory sulcus)	0.100926	0.0674973
Right orbital sulci (H-shaped sulci)	0.155596	0.129109
Right parieto-occipital sulcus (or fissure)	0.334715	0.303663
Right pericallosal sulcus (S of corpus callosum)	0.241768	0.21582
Right postcentral sulcus	0.250732	0.192746
Right inferior part of the precentral sulcus	0.262472	0.24919
Right superior part of the precentral sulcus	0.176706	0.16597
Right suborbital sulcus (sulcus rostrales, supraorbital sulcus)	0.114471	0.0801228
Right subparietal sulcus	0.335189	0.320052
Right inferior temporal sulcus	0.165178	0.161084
Right superior temporal sulcus (parallel sulcus)	0.421193	0.386289
Right transverse temporal sulcus	0.113926	0.106286
