# Supplementary material for: Genetic influences on brain representations of natural audiovisual experiences
Source: Research Square preprint supplement (doi:10.21203/rs.3.rs-902535/v1), 2021-09-24
Supplement: Supplementary file 8 [file c1648bf574047843a75e6e71.xlsx]

## Sheet: Sheet1
Region name	Mean correlation coefficient	T static	P value (FDR corrected)
Left-Thalamus-Proper	0.160975	0	2.37065e-14
Left-Caudate	0.115271	24	4.61106e-14
Left-Putamen	0.141921	15	3.37716e-14
Left-Pallidum	0.0637013	205	2.94969e-11
Brain-Stem	0.284462	1	2.37065e-14
Left-Hippocampus	0.165926	8	2.68947e-14
Left-Amygdala	0.113213	21	4.16615e-14
Left-Accumbens-area	0.0478763	212	3.69e-11
Right-Thalamus-Proper	0.297988	0	2.37065e-14
Right-Caudate	0.243374	0	2.37065e-14
Right-Putamen	0.135882	6	2.56304e-14
Right-Pallidum	0.0561355	128	2.05106e-12
Right-Hippocampus	0.222371	8	2.68947e-14
Right-Amygdala	0.194965	1	2.37065e-14
Right-Accumbens-area	0.0889423	52	1.30703e-13
ctx_lh_G_and_S_frontomargin	0.201681	0	2.37065e-14
ctx_lh_G_and_S_occipital_inf	0.360566	0	2.37065e-14
ctx_lh_G_and_S_paracentral	0.227153	0	2.37065e-14
ctx_lh_G_and_S_subcentral	0.326434	0	2.37065e-14
ctx_lh_G_and_S_transv_frontopol	0.196222	0	2.37065e-14
ctx_lh_G_and_S_cingul-Ant	0.220446	0	2.37065e-14
ctx_lh_G_and_S_cingul-Mid-Ant	0.129942	2	2.37065e-14
ctx_lh_G_and_S_cingul-Mid-Post	0.134435	6	2.56304e-14
ctx_lh_G_cingul-Post-dorsal	0.136382	0	2.37065e-14
ctx_lh_G_cingul-Post-ventral	0.0580976	207	3.13654e-11
ctx_lh_G_cuneus	0.40962	0	2.37065e-14
ctx_lh_G_front_inf-Opercular	0.310064	0	2.37065e-14
ctx_lh_G_front_inf-Orbital	0.16656	0	2.37065e-14
ctx_lh_G_front_inf-Triangul	0.272815	0	2.37065e-14
ctx_lh_G_front_middle	0.35868	0	2.37065e-14
ctx_lh_G_front_sup	0.357152	0	2.37065e-14
ctx_lh_G_Ins_lg_and_S_cent_ins	0.24767	5	2.54101e-14
ctx_lh_G_insular_short	0.257466	1	2.37065e-14
ctx_lh_G_occipital_middle	0.33254	0	2.37065e-14
ctx_lh_G_occipital_sup	0.380676	0	2.37065e-14
ctx_lh_G_oc-temp_lat-fusifor	0.341746	0	2.37065e-14
ctx_lh_G_oc-temp_med-Lingual	0.433769	0	2.37065e-14
ctx_lh_G_oc-temp_med-Parahip	0.130246	13	3.17059e-14
ctx_lh_G_orbital	0.250792	0	2.37065e-14
ctx_lh_G_pariet_inf-Angular	0.351627	0	2.37065e-14
ctx_lh_G_pariet_inf-Supramar	0.403837	0	2.37065e-14
ctx_lh_G_parietal_sup	0.407553	0	2.37065e-14
ctx_lh_G_postcentral	0.296476	0	2.37065e-14
ctx_lh_G_precentral	0.317255	0	2.37065e-14
ctx_lh_G_precuneus	0.438617	0	2.37065e-14
ctx_lh_G_rectus	0.122798	6	2.56304e-14
ctx_lh_G_subcallosal	0.084731	94	6.08007e-13
ctx_lh_G_temp_sup-G_T_transv	0.269887	0	2.37065e-14
ctx_lh_G_temp_sup-Lateral	0.381076	0	2.37065e-14
ctx_lh_G_temp_sup-Plan_polar	0.146845	14	3.27221e-14
ctx_lh_G_temp_sup-Plan_tempo	0.365194	0	2.37065e-14
ctx_lh_G_temporal_inf	0.202769	0	2.37065e-14
ctx_lh_G_temporal_middle	0.309667	0	2.37065e-14
ctx_lh_Lat_Fis-ant-Horizont	0.132132	4	2.46327e-14
ctx_lh_Lat_Fis-ant-Vertical	0.105301	0	2.37065e-14
ctx_lh_Lat_Fis-post	0.280256	0	2.37065e-14
ctx_lh_Pole_occipital	0.325192	0	2.37065e-14
ctx_lh_Pole_temporal	0.131821	18	3.76403e-14
ctx_lh_S_calcarine	0.304812	0	2.37065e-14
ctx_lh_S_central	0.254407	0	2.37065e-14
ctx_lh_S_cingul-Marginalis	0.151317	0	2.37065e-14
ctx_lh_S_circular_insula_ant	0.161668	3	2.40664e-14
ctx_lh_S_circular_insula_inf	0.24819	0	2.37065e-14
ctx_lh_S_circular_insula_sup	0.183185	0	2.37065e-14
ctx_lh_S_collat_transv_ant	0.0540753	274	2.8244e-10
ctx_lh_S_collat_transv_post	0.15347	0	2.37065e-14
ctx_lh_S_front_inf	0.335257	0	2.37065e-14
ctx_lh_S_front_middle	0.252992	3	2.40664e-14
ctx_lh_S_front_sup	0.341253	0	2.37065e-14
ctx_lh_S_interm_prim-Jensen	0.19491	0	2.37065e-14
ctx_lh_S_intrapariet_and_P_trans	0.449489	0	2.37065e-14
ctx_lh_S_oc_middle_and_Lunatus	0.338698	0	2.37065e-14
ctx_lh_S_oc_sup_and_transversal	0.338222	0	2.37065e-14
ctx_lh_S_occipital_ant	0.385293	0	2.37065e-14
ctx_lh_S_oc-temp_lat	0.213404	1	2.37065e-14
ctx_lh_S_oc-temp_med_and_Lingual	0.237724	0	2.37065e-14
ctx_lh_S_orbital_lateral	0.15348	0	2.37065e-14
ctx_lh_S_orbital_med-olfact	0.100698	31	5.98364e-14
ctx_lh_S_orbital-H_Shaped	0.176369	0	2.37065e-14
ctx_lh_S_parieto_occipital	0.276462	0	2.37065e-14
ctx_lh_S_pericallosal	0.0606184	182	1.35392e-11
ctx_lh_S_postcentral	0.33214	0	2.37065e-14
ctx_lh_S_precentral-inf-part	0.28921	0	2.37065e-14
ctx_lh_S_precentral-sup-part	0.216801	0	2.37065e-14
ctx_lh_S_suborbital	0.120646	1	2.37065e-14
ctx_lh_S_subparietal	0.169403	0	2.37065e-14
ctx_lh_S_temporal_inf	0.225979	2	2.37065e-14
ctx_lh_S_temporal_sup	0.473341	0	2.37065e-14
ctx_lh_S_temporal_transverse	0.165783	0	2.37065e-14
ctx_rh_G_and_S_frontomargin	0.177164	1	2.37065e-14
ctx_rh_G_and_S_occipital_inf	0.383474	0	2.37065e-14
ctx_rh_G_and_S_paracentral	0.349393	0	2.37065e-14
ctx_rh_G_and_S_subcentral	0.251636	0	2.37065e-14
ctx_rh_G_and_S_transv_frontopol	0.226873	0	2.37065e-14
ctx_rh_G_and_S_cingul-Ant	0.323679	0	2.37065e-14
ctx_rh_G_and_S_cingul-Mid-Ant	0.287757	0	2.37065e-14
ctx_rh_G_and_S_cingul-Mid-Post	0.287824	0	2.37065e-14
ctx_rh_G_cingul-Post-dorsal	0.294578	0	2.37065e-14
ctx_rh_G_cingul-Post-ventral	0.191918	1	2.37065e-14
ctx_rh_G_cuneus	0.454123	0	2.37065e-14
ctx_rh_G_front_inf-Opercular	0.275657	0	2.37065e-14
ctx_rh_G_front_inf-Orbital	0.161602	7	2.64455e-14
ctx_rh_G_front_inf-Triangul	0.282963	0	2.37065e-14
ctx_rh_G_front_middle	0.401242	0	2.37065e-14
ctx_rh_G_front_sup	0.461349	0	2.37065e-14
ctx_rh_G_Ins_lg_and_S_cent_ins	0.0820779	108	1.00539e-12
ctx_rh_G_insular_short	0.139299	8	2.68947e-14
ctx_rh_G_occipital_middle	0.46613	0	2.37065e-14
ctx_rh_G_occipital_sup	0.454749	0	2.37065e-14
ctx_rh_G_oc-temp_lat-fusifor	0.312954	0	2.37065e-14
ctx_rh_G_oc-temp_med-Lingual	0.383531	0	2.37065e-14
ctx_rh_G_oc-temp_med-Parahip	0.233381	2	2.37065e-14
ctx_rh_G_orbital	0.222476	0	2.37065e-14
ctx_rh_G_pariet_inf-Angular	0.49493	0	2.37065e-14
ctx_rh_G_pariet_inf-Supramar	0.424594	0	2.37065e-14
ctx_rh_G_parietal_sup	0.412263	0	2.37065e-14
ctx_rh_G_postcentral	0.293078	0	2.37065e-14
ctx_rh_G_precentral	0.365939	0	2.37065e-14
ctx_rh_G_precuneus	0.531762	0	2.37065e-14
ctx_rh_G_rectus	0.102344	68	2.34636e-13
ctx_rh_G_subcallosal	0.112336	6	2.56304e-14
ctx_rh_G_temp_sup-G_T_transv	0.210218	2	2.37065e-14
ctx_rh_G_temp_sup-Lateral	0.410215	0	2.37065e-14
ctx_rh_G_temp_sup-Plan_polar	0.251342	0	2.37065e-14
ctx_rh_G_temp_sup-Plan_tempo	0.358955	0	2.37065e-14
ctx_rh_G_temporal_inf	0.224947	0	2.37065e-14
ctx_rh_G_temporal_middle	0.38636	0	2.37065e-14
ctx_rh_Lat_Fis-ant-Horizont	0.11749	11	2.95598e-14
ctx_rh_Lat_Fis-ant-Vertical	0.0742286	57	1.56646e-13
ctx_rh_Lat_Fis-post	0.149072	4	2.46327e-14
ctx_rh_Pole_occipital	0.392047	0	2.37065e-14
ctx_rh_Pole_temporal	0.146916	2	2.37065e-14
ctx_rh_S_calcarine	0.360675	0	2.37065e-14
ctx_rh_S_central	0.206212	0	2.37065e-14
ctx_rh_S_cingul-Marginalis	0.282597	0	2.37065e-14
ctx_rh_S_circular_insula_ant	0.0800494	32	6.17497e-14
ctx_rh_S_circular_insula_inf	0.194456	9	2.77545e-14
ctx_rh_S_circular_insula_sup	0.101088	1	2.37065e-14
ctx_rh_S_collat_transv_ant	0.0862497	23	4.4677e-14
ctx_rh_S_collat_transv_post	0.198991	0	2.37065e-14
ctx_rh_S_front_inf	0.258506	0	2.37065e-14
ctx_rh_S_front_middle	0.265579	0	2.37065e-14
ctx_rh_S_front_sup	0.258327	0	2.37065e-14
ctx_rh_S_interm_prim-Jensen	0.189486	3	2.40664e-14
ctx_rh_S_intrapariet_and_P_trans	0.401482	0	2.37065e-14
ctx_rh_S_oc_middle_and_Lunatus	0.302776	0	2.37065e-14
ctx_rh_S_oc_sup_and_transversal	0.356603	0	2.37065e-14
ctx_rh_S_occipital_ant	0.259223	0	2.37065e-14
ctx_rh_S_oc-temp_lat	0.179053	1	2.37065e-14
ctx_rh_S_oc-temp_med_and_Lingual	0.273211	0	2.37065e-14
ctx_rh_S_orbital_lateral	0.104266	11	2.95598e-14
ctx_rh_S_orbital_med-olfact	0.108107	2	2.37065e-14
ctx_rh_S_orbital-H_Shaped	0.164863	0	2.37065e-14
ctx_rh_S_parieto_occipital	0.349918	0	2.37065e-14
ctx_rh_S_pericallosal	0.306491	0	2.37065e-14
ctx_rh_S_postcentral	0.243454	0	2.37065e-14
ctx_rh_S_precentral-inf-part	0.260664	0	2.37065e-14
ctx_rh_S_precentral-sup-part	0.182738	0	2.37065e-14
ctx_rh_S_suborbital	0.107685	21	4.16615e-14
ctx_rh_S_subparietal	0.342199	0	2.37065e-14
ctx_rh_S_temporal_inf	0.171568	1	2.37065e-14
ctx_rh_S_temporal_sup	0.42836	0	2.37065e-14
ctx_rh_S_temporal_transverse	0.177032	2	2.37065e-14
