# Supplementary material for: Genetic influences on brain representations of natural audiovisual experiences
Source: Research Square preprint supplement (doi:10.21203/rs.3.rs-902535/v1), 2021-09-24
Supplement: Supplementary file 9 [file e143673ba09c335a898b0ad1.xlsx]

## Sheet: SuppData6
Region name	Falconer's heritability	Holzinger's heritability
Left thalamus	0.0617718	0.0338274
Left caudate	0.0574493	0.0309113
Left putamen	0.0322059	0.0178377
Left pallidum	0.037123	0.0193347
Brain stem	0.025978	0.0142064
Left hippocampus	0.0332321	0.0179947
Left amygdala	0.0115892	0.0060823
Left accumbens	0.030884	0.015885
Right thalamus	0.0238991	0.0138704
Right caudate	0.0413914	0.0245913
Right putamen	0.0645801	0.0352415
Right pallidum	0.0466112	0.023893
Right hippocampus	-0.00811193	-0.0044323
Right amygdala	0.0230532	0.0123479
Right accumbens	0.0456604	0.0240311
Left fronto-marginal gyrus (of Wernicke) and sulcus	0.0408898	0.0245938
Left inferior occipital gyrus (O3) and sulcus	0.161973	0.109597
Left paracentral lobule and sulcus	0.0817945	0.0491228
Left subcentral gyrus (central operculum) and sulci	0.0610741	0.0401997
Left transverse frontopolar gyri and sulci	0.0246443	0.0147912
Left anterior part of the cingulate gyrus and sulcus (ACC)	0.0379887	0.0232696
Left middle-anterior part of the cingulate gyrus and sulcus (aMCC)	0.0424217	0.0233206
Left middle-posterior part of the cingulate gyrus and sulcus (pMCC)	0.038697	0.0214332
Left posterior-dorsal part of the cingulate gyrus (dPCC)	0.0691355	0.0388878
Left posterior-ventral part of the cingulate gyrus (vPCC, isthmus of the cingulate gyrus)	0.0402016	0.0209122
Left cuneus (O6)	0.147228	0.108463
Left opercular part of the inferior frontal gyrus	0.0590182	0.0385908
Left orbital part of the inferior frontal gyrus	0.0360202	0.0205213
Left triangular part of the inferior frontal gyrus	0.056061	0.0354606
Left middle frontal gyrus (F2)	0.0236144	0.0172723
Left superior frontal gyrus (F1)	0.0411243	0.0299173
Left long insular gyrus and central sulcus of the insula	0.0210212	0.011854
Left short insular gyri	0.0287136	0.0166534
Left middle occipital gyrus (O2, lateral occipital gyrus)	0.181766	0.117037
Left superior occipital gyrus (O1)	0.143984	0.102418
Left lateral occipito-temporal gyrus (fusiform gyrus, O4-T4)	0.107734	0.0748287
Left lingual gyrus, ligual part of the medial occipito-temporal gyrus, (O5)	0.125565	0.094168
Left parahippocampal gyrus, parahippocampal part of the medial occipito-temporal gyrus, (T5)	0.0705599	0.0375806
Left orbital gyri	0.0710832	0.0428936
Left angular gyrus	0.129839	0.0898153
Left supramarginal gyrus	0.0779975	0.0589751
Left superior parietal lobule (lateral part of P1)	0.109245	0.0841542
Left postcentral gyrus	0.0247168	0.0160734
Left precentral gyrus	0.0533978	0.0357794
Left precuneus (medial part of P1)	0.107157	0.0876485
Left straight gyrus, Gyrus rectus	0.094003	0.051617
Left subcallosal area, subcallosal gyrus	0.0604407	0.0316502
Left anterior transverse temporal gyrus (of Heschl)	0.0397193	0.0247522
Left lateral aspect of the superior temporal gyrus	0.0726944	0.0527693
Left planum polare of the superior temporal gyrus	0.0339614	0.0181896
Left planum temporale or temporal plane of the superior temporal gyrus	0.00656076	0.00471043
Left inferior temporal gyrus (T3)	0.106125	0.0620032
Left middle temporal gyrus (T2)	0.109425	0.0725621
Left horizontal ramus of the anterior segment of the lateral sulcus (or fissure)	0.0539453	0.0295403
Left vertical ramus of the anterior segment of the lateral sulcus (or fissure)	0.0485341	0.0262786
Left posterior ramus (or segment) of the lateral sulcus (or fissure)	0.0749183	0.0462739
Left occipital pole	0.168746	0.108225
Left temporal pole	0.105137	0.056477
Left calcarine sulcus	0.11873	0.0768259
Left central sulcus (Rolando's fissure)	0.0848141	0.0518356
Left marginal branch (or part) of the cingulate sulcus	0.0677816	0.0382283
Left anterior segment of the circular sulcus of the insula	0.0383775	0.021344
Left inferior segment of the circular sulcus of the insula	0.0420055	0.0235573
Left superior segment of the circular sulcus of the insula	0.057537	0.0331562
Left anterior transverse collateral sulcus	0.034289	0.0177381
Left posterior transverse collateral sulcus	0.0855944	0.0476243
Left inferior frontal sulcus	0.0114557	0.00845453
Left middle frontal sulcus	0.00367728	0.00237103
Left superior frontal sulcus	-0.0035028	-0.00254337
Left sulcus intermedius primus (of Jensen)	0.00400431	0.00238702
Left intraparietal sulcus (interparietal sulcus) and transverse parietal sulci	0.0778438	0.0665271
Left middle occipital sulcus and lunatus sulcus	0.111947	0.0784669
Left superior occipital sulcus and transverse occipital sulcus	0.163122	0.111621
Left anterior occipital sulcus and preoccipital notch (temporo-occipital incisure)	0.105006	0.0767275
Left lateral occipito-temporal sulcus	0.111693	0.0663939
Left medial occipito-temporal sulcus (collateral sulcus) and lingual sulcus	0.108412	0.0661142
Left lateral orbital sulcus	0.0643757	0.0363524
Left medial orbital sulcus (olfactory sulcus)	0.0630802	0.0337012
Left orbital sulci (H-shaped sulci)	0.0664004	0.0383785
Left parieto-occipital sulcus (or fissure)	0.0958095	0.0619826
Left pericallosal sulcus (S of corpus callosum)	0.0555951	0.0287827
Left postcentral sulcus	0.0675785	0.0470048
Left inferior part of the precentral sulcus	0.0413747	0.0284057
Left superior part of the precentral sulcus	0.0629241	0.0387196
Left suborbital sulcus (sulcus rostrales, supraorbital sulcus)	0.0723549	0.0393228
Left subparietal sulcus	0.0506792	0.0297979
Left inferior temporal sulcus	0.0746417	0.0459548
Left superior temporal sulcus (parallel sulcus)	0.0998761	0.0848206
Left transverse temporal sulcus	0.014589	0.0083386
Right fronto-marginal gyrus (of Wernicke) and sulcus	0.0560379	0.0327842
Right inferior occipital gyrus (O3) and sulcus	0.143504	0.103615
Right paracentral lobule and sulcus	0.0181608	0.0128297
Right subcentral gyrus (central operculum) and sulci	0.059128	0.0352225
Right transverse frontopolar gyri and sulci	0.0774899	0.0468381
Right anterior part of the cingulate gyrus and sulcus (ACC)	0.0129229	0.00876655
Right middle-anterior part of the cingulate gyrus and sulcus (aMCC)	-0.0119277	-0.00758805
Right middle-posterior part of the cingulate gyrus and sulcus (pMCC)	0.0553068	0.0352013
Right posterior-dorsal part of the cingulate gyrus (dPCC)	0.0718612	0.0475297
Right posterior-ventral part of the cingulate gyrus (vPCC, isthmus of the cingulate gyrus)	0.0655322	0.0371389
Right cuneus (O6)	0.0718585	0.0569109
Right opercular part of the inferior frontal gyrus	0.0606771	0.0378061
Right orbital part of the inferior frontal gyrus	0.0628479	0.035279
Right triangular part of the inferior frontal gyrus	0.0676942	0.0445727
Right middle frontal gyrus (F2)	-0.0204713	-0.016576
Right superior frontal gyrus (F1)	0.0133991	0.0113858
Right long insular gyrus and central sulcus of the insula	0.0187673	0.00982234
Right short insular gyri	0.0233701	0.0128169
Right middle occipital gyrus (O2, lateral occipital gyrus)	0.146588	0.123397
Right superior occipital gyrus (O1)	0.138138	0.111521
Right lateral occipito-temporal gyrus (fusiform gyrus, O4-T4)	0.0646766	0.043952
Right lingual gyrus, ligual part of the medial occipito-temporal gyrus, (O5)	0.0989814	0.0671616
Right parahippocampal gyrus, parahippocampal part of the medial occipito-temporal gyrus, (T5)	-0.00116906	-0.000636538
Right orbital gyri	0.0841966	0.050102
Right angular gyrus	0.0590856	0.0556493
Right supramarginal gyrus	0.0700554	0.0546479
Right superior parietal lobule (lateral part of P1)	0.0734628	0.0581881
Right postcentral gyrus	0.0960891	0.0616349
Right precentral gyrus	0.0438756	0.0324188
Right precuneus (medial part of P1)	0.0767624	0.0748013
Right straight gyrus, Gyrus rectus	0.0658645	0.0354552
Right subcallosal area, subcallosal gyrus	0.047195	0.0248318
Right anterior transverse temporal gyrus (of Heschl)	0.00973238	0.00546979
Right lateral aspect of the superior temporal gyrus	0.0391381	0.0285419
Right planum polare of the superior temporal gyrus	0.00438037	0.00246262
Right planum temporale or temporal plane of the superior temporal gyrus	0.0505659	0.0344119
Right inferior temporal gyrus (T3)	0.0965052	0.0590785
Right middle temporal gyrus (T2)	0.0704737	0.0545155
Right horizontal ramus of the anterior segment of the lateral sulcus (or fissure)	0.0352092	0.0194553
Right vertical ramus of the anterior segment of the lateral sulcus (or fissure)	0.029591	0.0155667
Right posterior ramus (or segment) of the lateral sulcus (or fissure)	0.0628424	0.0348802
Right occipital pole	0.128458	0.0903647
Right temporal pole	0.0907733	0.0490256
Right calcarine sulcus	0.0900302	0.0621702
Right central sulcus (Rolando's fissure)	0.077178	0.0453455
Right marginal branch (or part) of the cingulate sulcus	0.0934589	0.0604339
Right anterior segment of the circular sulcus of the insula	0.02969	0.0157952
Right inferior segment of the circular sulcus of the insula	0.0199444	0.010981
Right superior segment of the circular sulcus of the insula	0.0119797	0.00650153
Right anterior transverse collateral sulcus	0.0904017	0.0465382
Right posterior transverse collateral sulcus	0.0658877	0.038663
Right inferior frontal sulcus	0.0465831	0.0307891
Right middle frontal sulcus	-0.0186765	-0.0125308
Right superior frontal sulcus	-0.00452199	-0.00298652
Right sulcus intermedius primus (of Jensen)	-0.0238533	-0.0146611
Right intraparietal sulcus (interparietal sulcus) and transverse parietal sulci	0.0429859	0.0351814
Right middle occipital sulcus and lunatus sulcus	0.104785	0.0716498
Right superior occipital sulcus and transverse occipital sulcus	0.0992659	0.0737933
Right anterior occipital sulcus and preoccipital notch (temporo-occipital incisure)	0.0740577	0.0478732
Right lateral occipito-temporal sulcus	0.0281429	0.0167532
Right medial occipito-temporal sulcus (collateral sulcus) and lingual sulcus	0.0471678	0.0302072
Right lateral orbital sulcus	0.0497376	0.0270282
Right medial orbital sulcus (olfactory sulcus)	0.0668582	0.0358488
Right orbital sulci (H-shaped sulci)	0.0529749	0.0304142
Right parieto-occipital sulcus (or fissure)	0.0621038	0.0445932
Right pericallosal sulcus (S of corpus callosum)	0.0518974	0.0330902
Right postcentral sulcus	0.115971	0.0718305
Right inferior part of the precentral sulcus	0.0265626	0.0176893
Right superior part of the precentral sulcus	0.021473	0.012873
Right suborbital sulcus (sulcus rostrales, supraorbital sulcus)	0.0686969	0.0373402
Right subparietal sulcus	0.0302743	0.0222623
Right inferior temporal sulcus	0.00818728	0.00487968
Right superior temporal sulcus (parallel sulcus)	0.0698096	0.0568749
Right transverse temporal sulcus	0.0152797	0.00854844
